# Supplementary material for: Polymer microgels for the stabilization of gold nanoparticles and their application in the catalytic reduction of nitroarenes in aqueous media
Source: Royal Society of Chemistry journal article supplement (doi:10.1039/d1ra09380k), 2022-01-01
Supplement: d1ra09380k1.pdf [file d1ra09380k1.pdf]

# **Polymer microgels for stabilization of gold nanoparticles and their application in catalytic reduction of nitroarenes in aqueous medium**

Muhammad Arif <sup>a, b</sup>, Muhammad Shahid <sup>a</sup>, Ahmad Irfan <sup>c, d</sup>, Jan Nisar <sup>e</sup>, Weitai Wu <sup>f</sup>, Zahoor H.

Farooqi <sup>a, \*</sup>, Robina Begum <sup>a, \*</sup>

<sup>a</sup> *School of Chemistry, University of the Punjab, New Campus, Lahore 54590, Pakistan*

<sup>b</sup> *Department of Chemistry, School of Science, University of Management and Technology,*

*Lahore 54770, Pakistan*

<sup>c</sup> *Research Center for Advanced Materials Science (RCAMS), King Khalid University, P.O. Box*

*9004, Abha 61413, Saudi Arabia*

<sup>d</sup> *Department of Chemistry, Faculty of Science, King Khalid University, P.O. Box 9004, Abha*

*61413, Saudi Arabia*

<sup>e</sup> *National Centre of Excellence in Physical Chemistry, University of Peshawar, Peshawar*

*25120, Pakistan*

<sup>f</sup> *State Key Laboratory for Physical Chemistry of Solid Surfaces, Collaborative Innovation*

*Center of Chemistry for Energy Materials, The Key Laboratory for Chemical Biology of Fujian*

*Province, and Department of Chemistry, College of Chemistry and Chemical Engineering,*

*Xiamen University, Xiamen, Fujian 361005, China*

---

\* Corresponding Authors email addresses: [zhfarooqi@gmail.com](mailto:zhfarooqi@gmail.com), [Zahoor.chem@pu.edu.pk](mailto:Zahoor.chem@pu.edu.pk) (Z.

H. Farooqi), [robina.hons@pu.edu.pk](mailto:robina.hons@pu.edu.pk) (R. Begum)

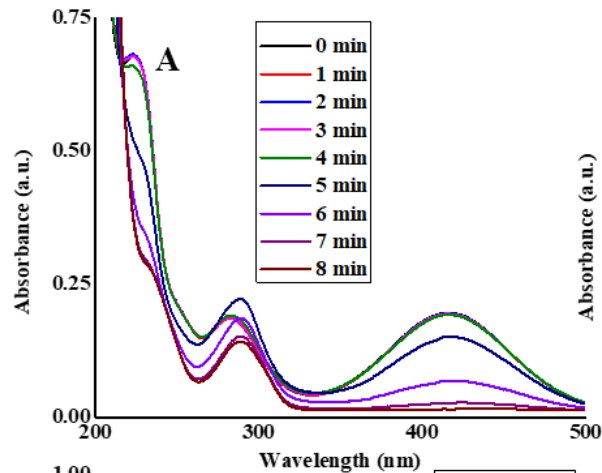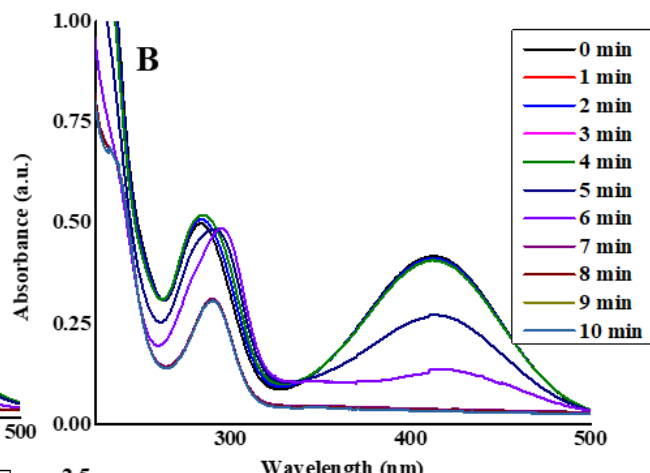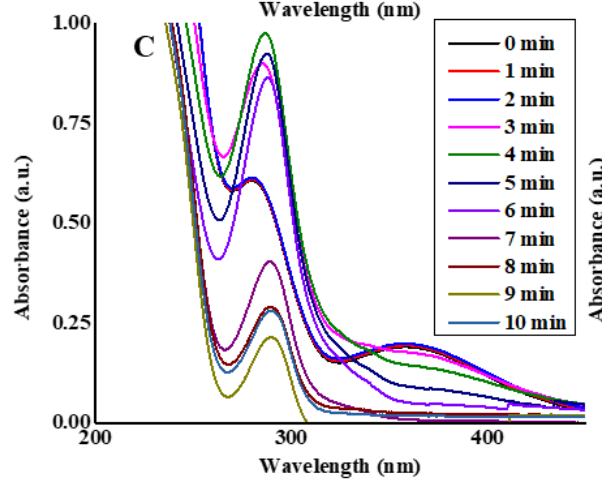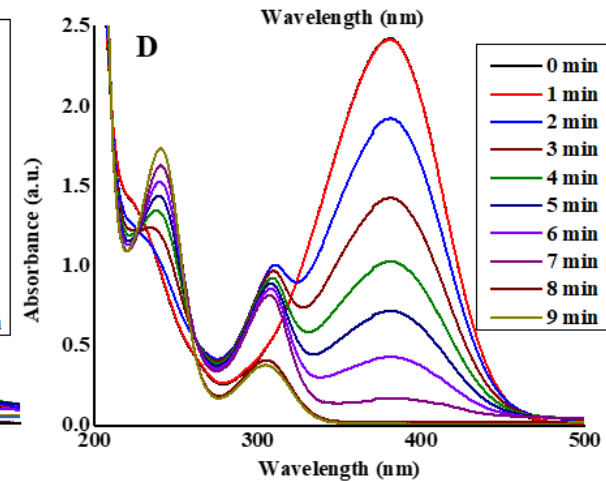

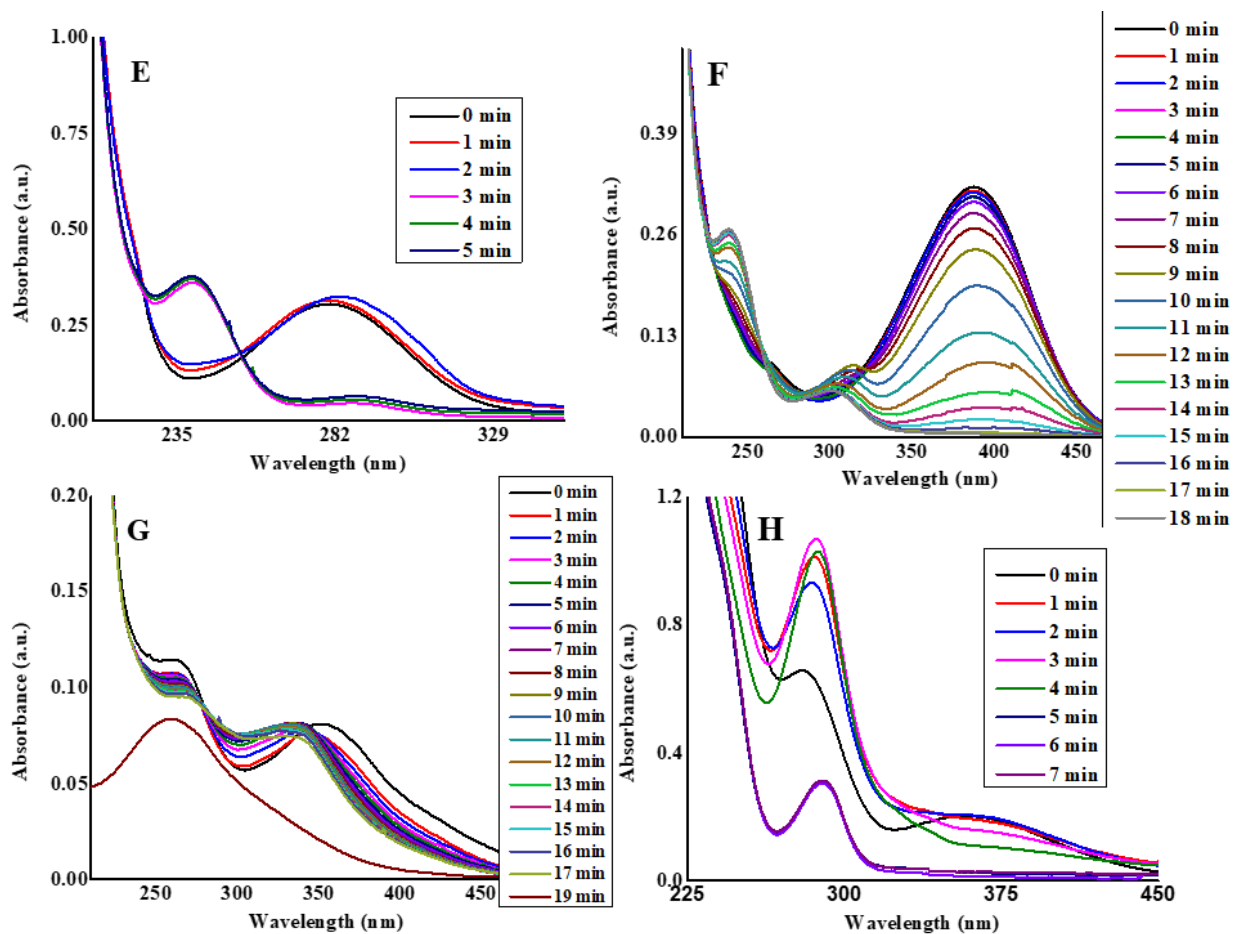

**Fig. S1.** Catalytic reduction of (A) 2NP, (B) 2NA, (C) 3NA, (D) 4NA, (E) 4CNB, (F) 4NPH, (G) 2,4DNP, and (H) 3NP [conditions: [substrate] = 0.057 mM, Au-P(STY@NIPM) = 2.40  $\mu\text{g/mL}$ ,  $\text{NaBH}_4$  = 2.66 mM].

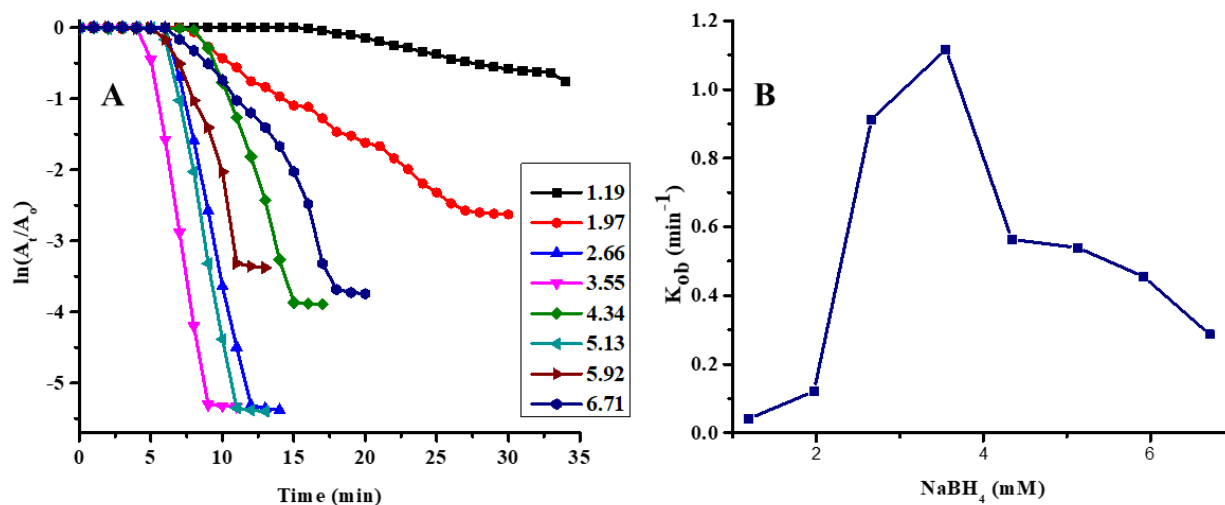

**S2:** (A)  $\ln(A_t/A_0)$  vs  $t$  function for 4NP reduction under different concentrations of  $\text{NaBH}_4$  in the presence of Au-P(STY@NIPM) [conditions: concentration of 4NP = 0.057 mM, Au-P(STY@NIPM) = 2.40  $\mu\text{g/mL}$ ,  $\text{NaBH}_4$  = 1.19-6.71 mM] and (B) the dependence of  $k_{ob}$  on  $\text{NaBH}_4$  concentration.

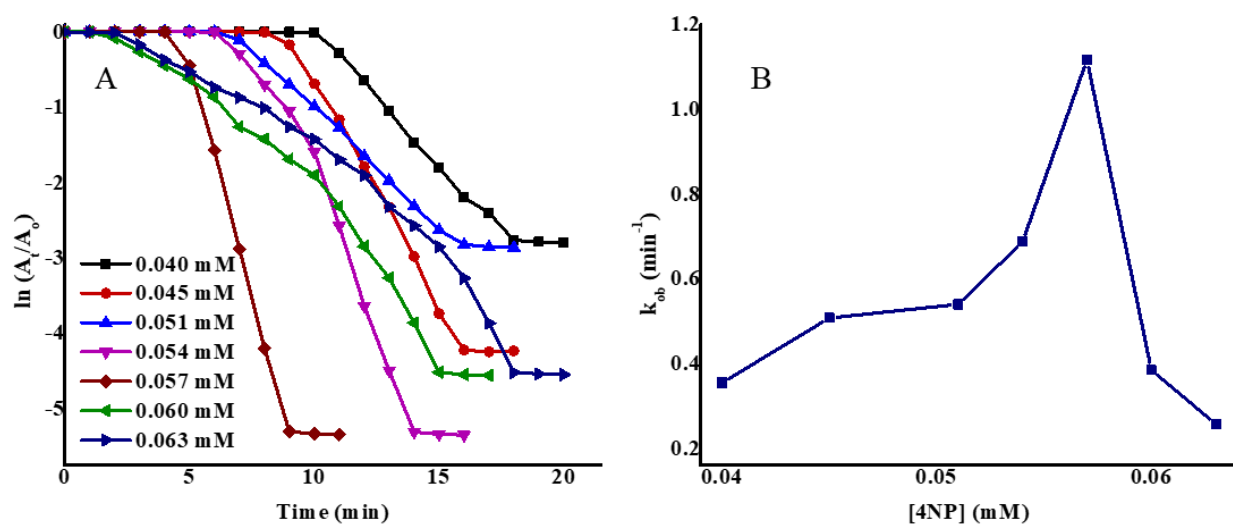

**Fig. S3.** (A)  $\ln(A_t/A_0)$  vs time for 4NP reduction under its different concentrations [conditions: Au-P(STY@NIPM) = 2.40  $\mu\text{g/mL}$ ,  $\text{NaBH}_4$  = 2.66 mM], and (B) plot of  $k_{ob}$  as a function of [4NP].
